# Supplementary material for: T-cell responses to ancestral SARS-CoV-2 and Omicron in unvaccinated hospitalised adults living with and without HIV in South Africa
Source: Research Square preprint supplement (doi:10.21203/rs.3.rs-7588105/v1), 2025-11-26
Supplement: Supplementary file 1 [file 1926d715bf91ec6d6082e0b2.xlsx]

## Sheet: Fig. 1
Fig. 1: T-cell immunity to full-length spike and nucleocapsid proteins of ancestral SARS-CoV-2.
Fig. 1a
CD4+ T cells				CD8+ T cells				CD4+CD8+ (DP) T cells
HIV-uninfected		PLWH		HIV-uninfected		PLWH		HIV-uninfected		PLWH
FLS (n=19) 1,73	N (n=19) 2,11	FLS (n=16) 1,35	N (n=16) 1,95	FLS (n=19) 1,16	N (n=19) 1,12	FLS (n=17) 1,10	N (n=17) 1,19	FLS (n=19) 0,14	N (n=19) 1,53	FLS (n=17) 0,66	N (n=17) 0,40	Median Response (%)
1.77	2.22	2.85	2.25	1.05	1.07	2.49	2.76	0.015	1.86	1.85	0.4
3.09	3.46	1.98	2.13	1.22	1.25	1.51	1.57	0.015	1.52	0.19	0.015
0.36	0.84	2.02	2.01	1.98	1.97	1.55	1.6	0.015	0.015	0.74	0.43
2.2	3.26	2.04	2.21	1.12	1.25	1.06	0.88	0.32	1.53	1.21	0.54
1.08	1.25	1.05	1.59	1.8	1.46	1.01	0.83	0.99	0.015	0.66	0.015
2.44	2.66	1.47	2.06	1.16	1.12	1.4	1.37	0.86	1.63	3.61	5.2
1.19	2.05	1.27	1.97	2.33	1.47	0.7	0.85	0.015	11.7	0.19	1.14
2.48	2.34	1.16	0.86	1.19	1.02	0.98	0.8	1.03	0.32	0.015	0.4
1.5	2.04	1.24	1.79	0.73	1.17	1.1	0.98	3.3	2.38	1.08	0.09
1.55	1.61	1.74	2.17	1.22	1	1.69	1.85	0.06	2.07	1.45	0.52
1.56	0.48	1.23	1.93	0.83	0.84	0.79	0.85	1.12	0.1	0.015	0.94
2.38	2.24	2.05	2.51	2.35	2.11	0.83	1.35	0.14	1.1	0.015	0.015
1.45	1.34	1.27	1.44	0.72	0.87	0.89	0.58	0.015	0.015	0.015	0.015
0.99	3.22	0.015	0.015	0.75	1.85	1.27	1.47	1.34	4.48	1.19	0.16
0.63	2.39	0.74	0.87	0.35	1.37	1.88	1.19	0.06	1.82	2.93	10.75
2.03	2.11	1.42	1.63	1.8	1.11	2.03	2.66	1.07	2.82	0.015	18.63
1.73	1.66			1.27	0.8	0.86	0.94	0.77	0.015	0.015	0.015
1.95	2.86			1.08	0.8			0.015	2.37
1.88	1.86			0.59	0.68			0.015	0.015
Fig. 1b
CD4+ Polyfunctional T-cell Responses (FLS-specific)														CD8+ Polyfunctional T-cell Responses (FLS-specific)
I+2+T+		I+2+		I+T+		2+T+		I+		2+		T+		I+2+T+		I+2+		I+T+		2+T+		I+		2+		T+
HIV-	PLWH	HIV-	PLWH	HIV-	PLWH	HIV-	PLWH	HIV-	PLWH	HIV-	PLWH	HIV-	PLWH	HIV-	PLWH	HIV-	PLWH	HIV-	PLWH	HIV-	PLWH	HIV-	PLWH	HIV-	PLWH	HIV-	PLWH
0.029	0.16	0.002	0.16	0.031	0.12	0.11	0.579	0.69	0.379	0.67	0.84	0.23	0.61	0	0.025	0.02438	0.028	0.04	0.033	0.077	0.105	0.18	0.763	0.47	0.78	0.3	0.75
0.07883	0.16	0.032	0.03058	0.04266	0.058	0.45	0.236	0.7	0.315	0.63	0.775	1.15	0.41	0.015	0.00207	0.088	0.00769	0.005	0.04015	0.136	0.057	0.34	0.451	0.23	0.523	0.41	0.44
0	0.145	0	0.04636	0	0.026	0	0.185	0.37	0.6	0.653	0.56	0	0.46	0	0.02	0.075	0.02471	0	0.023	0	0.059	0.75	0.36	1.3	0.55	0.069	0.51
0	0.06158	0.0362	0.02279	0.034	0.02279	0.04	0.282	0.69	0.413	0.96	0.68	0.53	0.56	0	0.012	0.015	0	0.02	0	0	0.038	0.19	0.24	0.62	0.498	0.5	0.28
0	0.061	0.004	0	0	0.011	0	0.14	0.46	0.42	0.68	0.26	0	0.17	0	0.004	0.025	0.009	0.042	0.001	0.051	0.098	0.41	0.23	0.83	0.35	0.44	0.33
0.058	0	0.031	0.065	0.018	0.085	0.26	0.08	0.647	0.165	0.689	0.39	0.73	0.73	0.01665	0	0.00485	0.02291	0.024	0.033	0.113	0.128	0.278	0.43	0.295	0.39	0.42	0.4
0.051	0.016	0.014	0.008	0.01902	0.027	0.14	0.05	0.349	0.31	0.31	0.35	0.31	0.5	0.058	0	0.191	0.003	0.131	0	0.23	0.08	0.88	0.17	0.41	0.27	0.42	0.19
0.11	0.02	0.02342	0.041	0.042	0.031	0.33	0.11	0.54	0.4	0.73	0.52	0.71	0.05	0.014	0	0.007	0.0061	0.0072	0.019	0.083	0.008	0.41	0.31	0.321	0.37	0.35	0.28
0.024	0.027	0.01644	0.031	0.031	0.012	0.06	0.1	0.36	0.35	0.43	0.56	0.57	0.17	0	0	0.00255	0.01215	0	0	0.014	0.05	0.22	0.43	0.28	0.32	0.25	0.32
0.01465	0.055	0.0283	0.0546	0.009	0.029	0.1	0.151	0.39	0.26	0.56	0.58	0.44	0.6	0	0.04777	0.013	0.00754	0.00854	0.077	0.124	0.066	0.15	0.5	0.63	0.49	0.31	0.51
0.01988	0.05838	0.018	0.00914	0.022	0.011	0.152	0.034	0.39	0.68	0.48	0.35	0.48	0.08	0.0028	0	0.01415	0.009	0.014	0.072	0.055	0	0.17	0.19	0.48	0.44	0.08	0.12
0.02339	0.14089	0.03344	0.017	0.046	0.05235	0.05	0.27	1.04	0.52	0.96	0.6	0.22	0.46	0.019	0.00477	0.01502	0.005	0.017	0.004	0.07	0	0.67	0.17	0.97	0.42	0.6	0.23
0	0.041	0.032	0.021	0	0.02	0.1	0.21	0.67	0.75	0.46	0.66	0.41	0	0	0.00632	0.002	0.014	0	0.017	0	0.127	0.21	0.36	0.32	0.42	0.31	0
0.00294	0	0.00294	0	0	0	0.01	0	0.41	0.19	0.43	0.28	0.15	0	0.02	0.009	0.00789	0.0048	0	0.007	0.018	0.122	0.36	0.34	0.25	0.2	0.088	0.59
0.049	0.044	0	0.016	0	0.028	0.22	0.11	0	0.29	0	0.24	0.61	0	0.00634	0.186	0	0.00606	0.031	0.141	0.12	0.32	0	0.36	0	0.39	0.34	0.47
0.395	0.08642	0.01	0.024	0.062	0.00242	0.5	0.3	0.62	0.494	0.42	0.53	0.03	0	0.02111	0	0.01316	0.03415	0.047	0.003	0.057	0.069	0.55	0.45	0.74	0.73	0.38	0.74
0		0.018		0.003		0		0.51		0.58		0.62		0.013	0	0	0.021	0.015	0.02	0.006	0.001	0.17	0.262	0.57	0.47	0.52	0.08
0.048		0.01594		0.031		0.105		0.52		0.62		0.62		0.1		0.034		0.11		0.079		0.29		0.27		0.21
0.19287		0.01162		0.237		0.26		0.49		0.49		0.21		0.00693		0.00746		0.03		0.035		0.3		0.05		0.15
Key: I=IFN-γ; 2=IL-2; T=TNF-α
Fig. 1c
CD4+ Polyfunctional T-cell Responses (N-specific)														CD8+ Polyfunctional T-cell Responses (N-specific)
I+2+T+		I+2+		I+T+		2+T+		I+		2+		T+		I+2+T+		I+2+		I+T+		2+T+		I+		2+		T+
HIV-	PLWH	HIV-	PLWH	HIV-	PLWH	HIV-	PLWH	HIV-	PLWH	HIV-	PLWH	HIV-	PLWH	HIV-	PLWH	HIV-	PLWH	HIV-	PLWH	HIV-	PLWH	HIV-	PLWH	HIV-	PLWH	HIV-	PLWH
0.011	0.067	0.024	0.06	0.044	0.067	0.13	0.369	0.72	0.519	0.74	0.63	0.55	0.53	0	0.046	0	0.024	0	0.037	0.029	0.165	0.21	0.823	0.46	0.61	0.42	1.06
0.11583	0.037	0.032	0.04058	0.08166	0.023	0.53	0.216	0.8	0.645	0.69	0.765	1.21	0.4	0.027	0.00797	0.027	0.01859	0	0.05115	0.226	0.095	0.05	0.431	0.29	0.453	0.65	0.51
0	0.105	0.12	0.03436	0	0.05	0.06	0.195	0.04	0.5	0.603	0.49	0.01	0.63	0	0.048	0	0.02271	0	0.005	0	0.06	1.56	0.34	0.33	0.42	0.289	0.7
0	0.06358	0.0442	0.03479	0.056	0.03779	0.06	0.252	1.06	0.453	1.11	0.87	1.02	0.49	0	0.02	0.011	0.01089	0.014	0	0	0.059	0.16	0.29	0.58	0.348	0.7	0.16
0.002	0.016	0.039	0.036	0	0.005	0	0.1	1.01	0.52	0.63	0.53	0	0.38	0	0.006	0.05	0.009	0.021	0	0.007	0	0.56	0.17	0.66	0.42	0.17	0.24
0.038	0.213	0.05	0.049	0.049	0.165	0.17	0.36	0.607	0.145	1.049	0.65	0.7	0.47	0.01465	0	0.01199	0.00881	0.033	0.03	0.051	0.138	0.268	0.36	0.385	0.28	0.36	0.55
0.112	0.06	0.033	0.031	0.05802	0.03	0.35	0.23	0.439	0.49	0.26	0.66	0.79	0.47	0.039	0	0.081	0	0.081	0.003	0.07	0.11	0.54	0.27	0.27	0.21	0.39	0.25
0.049	0.013	0.03642	0.013	0.055	0.024	0.09	0.2	1.04	0.1	0.57	0.25	0.5	0.25	0.015	0.00497	0.004	0.0251	0.0262	0.002	0.004	0.016	0.39	0.27	0.271	0.43	0.31	0.06
0.053	0.002	0.02244	0	0.042	0.11	0.19	0.02	0.54	0.46	0.69	0.59	0.51	0.61	0.007	0	0.01967	0.00615	0.024	0	0.122	0	0.29	0.48	0.29	0.17	0.43	0.36
0.01965	0.047	0.0173	0.0496	0.048	0	0.11	0.201	0.64	0.54	0.34	0.73	0.43	0.59	0	0.01077	0.014	0.03254	0.02354	0.069	0.074	0.096	0.34	0.35	0.17	0.56	0.4	0.74
6e-05	0.02938	0.00518	0.01314	0	0.031	0.072	0.084	0.27	0.74	0.19	0.49	0	0.53	0	0.00596	0	0	0	0.057	0.084	0.036	0.33	0.23	0.11	0.17	0.3	0.37
0.02839	0.11089	0.03244	0.049	0.066	0.05635	0.12	0.42	0.99	0.75	0.73	0.73	0.27	0.4	0.00705	0.05358	0.06602	0.056	0.043	0.088	0.043	0.015	0.59	0.29	1.04	0.4	0.32	0.45
0	0.096	0.014	0.048	0	0.032	0.06	0.27	0.55	0.69	0.46	0.62	0.48	0	0.004	0.00632	0.008	0.003	0.01	0.006	0	0.032	0.44	0.41	0.26	0.47	0.2	0
0.00294	0	0.03994	0	0.05194	0	0.333	0	0.47	0	0.69	0	1.64	0	0.026	0	0.04089	0.01749	0.033	0.025	0.029	0.142	0.2	0.49	0.29	0.41	1.238	0.4
0.019	0.004	0	0.032	0.027	0.032	0.22	0.02	0.01	0.31	0.19	0.4	1.92	0.07	0.02874	0	0.012	0.00906	0.074	0.035	0.01	0	0.04	0.35	0.21	0.26	0.98	0.54
0.145	0.01542	0.014	0.019	0.037	0.04142	0.36	0.12	0.83	0.604	0.49	0.53	0.23	0.3	0.07711	0.00187	0.01816	0.04415	0.022	0	0	0.028	0.34	0.68	0.34	1.2	0.33	0.7
0.009		0.018		0.044		0.05		0.59		0.32		0.63		0.015	0.012	0.004	0	0.049	0.012	0	0.018	0.32	0.402	0.03	0.33	0.39	0.18
0.077		0.02794		0.054		0.145		0.8		0.79		0.96		0.09		0.012		0.06		0.082		0.16		0.19		0.22
0.10287		0.02962		0.067		0.18		0.26		0.4		0.82		0		0.018		0.07		0.029		0.33		0		0.22
Key: I=IFN-γ; 2=IL-2; T=TNF-α
		Fig. 1d
		CD4+ T cells	CD8+ T cells	DP T cells
Combined		0.6395	0.6219	0.205
HIV-uninfected		0.5123	0.4266	0.1798
PLWH		0.9139	0.7885	0.3613
		Fig. 1e
		CD4+ T cells			CD8+ T cells			DP T cells
		IFN-γ+	IL-2+	TNF-α+	IFN-γ+	IL-2+	TNF-α+	IFN-γ+	IL-2+	TNF-α+
Combined		0.7222	0.6414	0.593	0.674	0.4707	0.5048	0.3902	-0.0372	-0.1273
HIV-uninfected		0.6948	0.6441	0.4519	0.5596	0.4446	0.1126	0.327	-0.0434	-0.0235
PLWH		0.6353	0.6627	0.6868	0.748	0.5541	0.8011	0.4342	0.0191	-0.1317

## Sheet: Fig. 2
Fig. 2. Relationship between T-cell activation markers HLA-DR and CD38 and expression of CD26 (DPP4).
Fig. 2a
HIV-uninfected			PLWH
CD4+ T cells (n=18) 81,5	CD8+ T cells (n=18) 27,9	DP T cells (n=18) 55,9	CD4+ T cells (n=17) 73,4	CD8+ T cells (n=17) 21,2	DP T cells (n=17) 58,2	Median (%)
83.4	48	61.5	64.5	31.1	53.5
67.2	20.7	70.4	73.7	15.5	58.2
76.2	18.3	59.1	82.8	59.4	16.8
75.6	36.7	55.9	39.4	9.6	1.82
89.3	41.6	85.3	24.2	13.3	26.5
78.6	20.9	18.6	41	18.7	84.8
64.6	20.7	40.7	88.1	50.8	46.2
42.6	18.3	31.2	48.8	11.7	22.6
77.9	25	32	73.4	37.8	83.1
89.4	68	55.8	57.5	15.6	21
85.2	42.3	76.6	84.3	32	75.2
90.1	66.2	72.7	79.5	36.6	49.7
85.7	30.9	40.2	95.8	15.6	93.3
91.2	19	73.5	66.5	29.3	69.5
79.6	40.7	26.4	57.3	21.2	77.4
85.6	11.9	41.7	83.4	10.1	72.4
90.9	65.6	83.9	80.7	68.3	68.6
49.7	21.5	25.2
Fig. 2b
HLA-DR+CD38-				HLA-DR+CD38+				HLA-DR-CD38+
HIV-uninfected		PLWH		HIV-uninfected		PLWH		HIV-uninfected		PLWH
CD4+ T cells (n=21) 2,81	CD8+ T cells (n=21) 15,0	CD4+ T cells (n=17) 3,35	CD8+ T cells (n=17) 12,9	CD4+ T cells (n=21) 1,47	CD8+ T cells (n=21) 7,55	CD4+ T cells (n=17) 3,61	CD8+ T cells (n=17) 12,2	CD4+ T cells (n=21) 26,7	CD8+ T cells (n=21) 12,0	CD4+ T cells (n=17) 44,0	CD8+ T cells (n=17) 19,8	Median (%)
1.89	11.2	6.22	16.7	0.76	11.6	4.92	36.4	32.5	17.2	53.2	17.2
1.37	3.16	2.32	12.8	1.13	6.21	1.66	21.5	22.1	28.2	51.5	18.7
1.52	3.16	3.35	12.9	1.47	1.82	1.87	11.1	10.6	5.19	36.7	33.4
1.52	14.4	12.3	24.9	0.82	8.78	13.2	20.4	26.9	20.6	45.6	19.8
1.03	1.18	2.96	7.87	0.9	1.66	1.17	4.93	24.2	28.8	44	34.7
2.81	16.6	12.3	6	2.22	5.58	17.8	31.2	39.2	21	32.8	46.1
1.4	7.28	1.65	8.37	1.15	7.55	1.76	12.3	37.9	9.33	59.7	28.1
2.91	11.4	14.4	11.1	2.04	12.2	9.72	27.6	35.7	23.3	37.7	38.1
5.44	17.3	0.94	4.72	2.65	8.04	2.23	6.83	57.1	31.4	60.8	27.8
21.5	23.9	7.34	26.3	5.33	29.9	7.18	12.2	46.7	18.2	30.2	8.35
4.63	17.2	0.93	5.65	3.75	12.9	0.89	4.48	48.3	30.2	76.7	27.2
8.35	18.8	4.74	13.5	5.71	15.9	3.61	32.2	20.7	9.73	56.1	23.8
7.07	23.7	2.91	17.4	3.67	8.57	8.74	20.9	31.3	12	47.6	18.2
5.62	8.32	15.9	36.1	4.49	7.06	3.67	5.39	25.4	11.8	5.52	2.81
1.83	4.46	18	37.9	1.72	17.5	12.2	8.13	63.2	21	23.2	6.67
7.97	43.5	1.7	16.4	14.3	12	1.4	1.08	26.7	5.89	7.31	1.44
1.72	21.9	3.22	6.51	0.81	2.69	0.038	0.28	6.15	2.78	0.47	0.4
3.63	15			0.26	0.33			1.27	0.27
1.64	18.6			0.063	0.26			0.38	0.13
2.72	16.7			0.086	0.081			0.54	0.19
4.19	14.7			0.015	0.21			0.93	0.21
			Fig. 2c
			Combined		HIV- uninfected		PLWH
CD4+HLA-DR+CD38-			-0.5884		-0.4925		-0.6585
CD4+HLA-DR+CD38+			-0.5955		-0.6429		-0.5
CD4+HLA-DR-CD38+			-0.1646		-0.3973		0.2549
CD8+HLA-DR+CD38-			-0.326		-0.3183		-0.3409
CD8+HLA-DR+CD38+			-0.2901		-0.22		-0.1459
CD8+HLA-DR-CD38+			-0.109		-0.0971		-0.0098
CD4+CD8+HLA-DR+CD38-			-0.1964		-0.1621		-0.1887
CD4+CD8+HLA-DR+CD38+			-0.0933		0.0382		-0.152
CD4+CD8+HLA-DR-CD38+			-0.1153		0.0237		-0.1985
			Fig. 2d
			Combined		HIV-uninfected		PLWH
			FLS	N	FLS	N	FLS	N
CD4+CD26+			0.1502	0.1827	0.125	0.1618	0.0206	0.0147
CD8+CD26+			-0.0993	-0.0546	0.1099	-0.0823	-0.2882	0.0785
CD4+CD8+CD26+			-0.1832	0.2843	-0.3759	0.4293	-0.0238	0.0496
CD4+HLA-DR+CD38-			0.112	-0.1221	0.0842	-0.1754	0.0912	-0.0735
CD4+HLA-DR+CD38+			0.1042	-0.0761	-0.0053	-0.2333	0.2235	0.1882
CD4+HLA-DR-CD38+			0.0573	0.1331	-0.1404	-0.0719	0.25	0.4471
CD8+HLA-DR+CD38-			0.159	-0.1003	-0.0588	-0.6038	0.4721	0.3495
CD8+HLA-DR+CD38+			0.0176	0.1513	-0.0716	0.1369	0.0711	0.1471
CD8+HLA-DR-CD38+			-0.2294	-0.094	-0.1352	0.2151	-0.3382	-0.3995
CD4+CD8+HLA-DR+CD38-			0.2614	0.0851	0.1475	-0.0372	0.2582	0.113
CD4+CD8+HLA-DR+CD38+			0.2306	0.0912	0.2367	0.2991	0.2455	-0.0422
CD4+CD8+HLA-DR-CD38+			0.1864	-0.0312	0.3904	0.054	0.0163	0.0298

## Sheet: Fig. 3
Fig. 3. T-cell immunity and cross-reactivity to the Omicron variant (BA.4/BA.5).
Fig. 3a
CD4+ T cells				CD8+ T cells				CD4+CD8+ (DP) T cells
HIV-uninfected		PLWH		HIV-uninfected		PLWH		HIV-uninfected		PLWH
Ancestral (n=19) 1,90	Omicron (n=19) 1,74	Ancestral (n=13) 1,50	Omicron (n=13) 1,85	Ancestral (n=19) 1,14	Omicron (n=19) 1,10	Ancestral (n=14) 1,31	Omicron (n=14) 1,08	Ancestral (n=19) 0,96	Omicron (n=19) 0,89	Ancestral (n=14) 0,55	Omicron (n=14) 0,47	Median Response (%)
1.76	1.27	2.3	2.23	0.73	1.01	3.28	2.83	2.2	3.39	0.08	3.67
2.62	2.7	2.61	2.48	1.14	0.96	1.73	1.48	0.6	4.45	0.015	0.015
0.015	0.11	2.11	1.4	1.23	1.3	1.27	1	0.015	0.015	1.4	0.87
2.47	2.96	1.87	1.96	1.94	1.82	0.77	1.04	2.8	2.19	0.55	0.015
0.54	1.36	1.5	1.85	1.45	1.41	0.91	0.9	0.015	0.63	1	0.015
2.34	2.37	3.47	2.7	1.3	0.78	1.77	1.5	0.96	1.37	5.58	9.4
1.78	1.87	1.15	1.23	1.16	1.09	0.49	0.29	6.5	0.015	0.54	1.77
2.44	1.78	0.83	0.55	0.88	1.17	0.82	0.45	1.2	0.16	0.015	3.83
2.18	2.1	1.27	1.63	0.79	0.93	1.44	1.68	1.42	1.45	1.48	2.66
2.02	1.6	1.41	2.04	1.15	1.19	1.35	1.12	3.51	1.71	0.06	0.07
0.55	0.56	1.36	1.35	0.79	0.95	0.52	0.57	0.71	0.8	1.71	0.015
2.87	2.2	2.64	2.01	2.01	1.93	1.56	1.71	0.45	0.43	0.015	0.015
1.9	1.74	1.21	1.2	1.09	1.15	0.33	0.43	0.015	0.015	0.015	0.015
2.95	2.78			2.35	2.19	2.42	1.99	5.44	4.74	11.13	1.05
0.63	0.015			0.06	0.015			0.66	0.89
1.36	1.59			1.68	1.66			0.41	1.18
1.88	1.17			0.92	0.91			0.015	0.27
2.77	2.66			0.94	1.1			1.31	0.96
1.24	1.37			0.5	0.75			1.21	0.35
Fig. 3b
HIV-uninfected		PLWH
CD4+ T cells (n=17) 0,96	CD8+ T cells (n=18) 1,01	CD4+ T cells (n=13) 0,99	CD8+ T cells (n=14) 0,86	Median Fold Change
0.72	1.38	0.97	0.86
1.03	0.84	0.95	0.86
1.2	1.06	0.66	0.79
2.52	0.94	1.05	1.35
1.01	0.97	1.23	0.99
1.05	0.6	0.78	0.85
0.73	0.94	1.07	0.59
0.96	1.33	0.66	0.55
0.79	1.18	1.28	1.17
1.02	1.03	1.45	0.83
0.77	1.2	0.99	1.1
0.92	0.96	0.76	1.1
0.94	1.06	0.99	1.3
1.17	0.93		0.82
0.62	0.99
0.96	0.99
1.1	1.17
	1.5
Fig. 3c
CD4+ Polyfunctional T-cell Responses (Ancestral)														CD4+ Polyfunctional T-cell Responses (Omicron)
I+2+T+		I+2+		I+T+		2+T+		I+		2+		T+		I+2+T+		I+2+		I+T+		2+T+		I+		2+		T+
HIV-	PLWH	HIV-	PLWH	HIV-	PLWH	HIV-	PLWH	HIV-	PLWH	HIV-	PLWH	HIV-	PLWH	HIV-	PLWH	HIV-	PLWH	HIV-	PLWH	HIV-	PLWH	HIV-	PLWH	HIV-	PLWH	HIV-	PLWH
0	0.041	0.011	0.074	0.035	0.068	0	0.229	0.85	0.569	0.49	0.73	0.38	0.6	0	0.034	0.01	0.054	0.021	0.048	0.02	0.229	0.51	0.639	0.39	0.64	0.32	0.59
0.03183	0.038	0.021	0.02058	0.03266	0.052	0.3	0.166	0.55	0.845	0.59	0.815	1.09	0.67	0.04683	0.043	0.031	0.01958	0.03266	0	0.28	0.126	0.68	0.685	0.63	0.815	0.99	0.78
0	0.003	0	0.02236	0	0.03	0	0.085	0.05	0.89	0.533	0.8	0	0.28	0.05	0.005	0	0.02036	0	0.019	0.03	0.065	0.12	0.53	0.563	0.27	0	0.48
0	0.01258	0.0152	0.01879	0.025	0.02879	0.01	0.044	0.92	0.723	0.91	0.73	0.7	0.31	0	0.02158	0.0182	0.01279	0.024	0.02179	0.15	0.192	0.78	0.393	1.01	0.76	1.08	0.55
0	0.054	0.033	0.003	0.04	0.012	0	0.08	0.4	0.58	0.53	0.59	0	0.18	0.013	0.033	0.025	0.001	0.05	0.109	0	0.13	0.54	0.4	0.74	0.73	0	0.44
0.014	0.063	0.026	0.104	0.025	0.235	0.14	0.45	0.677	0.355	0.759	0.51	0.68	1.76	0.031	0.043	0.041	0.029	0.006	0.165	0.08	0.24	0.777	0.265	0.789	0.3	0.64	1.66
0.058	0	0	0.006	0.13102	0.011	0.15	0.01	0.489	0.43	0.26	0.34	0.68	0.37	0.021	0	0.013	0.005	0.09102	0.037	0.27	0.02	0.199	0.28	0.32	0.54	0.93	0.36
0.024	0.002	0.02542	0.015	0.033	0.013	0.15	0	0.89	0.29	0.7	0.11	0.61	0.41	0.01	0	0.01842	0	0.027	0.11	0.11	0.05	0.67	0.03	0.6	0.09	0.35	0.29
0.022	0.014	0.02944	0	0.052	0.05	0.15	0	0.58	0.48	0.7	0.34	0.66	0.47	0	0.011	0.01844	0.014	0.037	0.11	0.05	0.02	0.56	0.5	0.9	0.31	0.55	0.66
0.00658	0.005	0.0133	0.0226	0.035	0	0.08	0.081	0.56	0.42	0.66	0.6	0.65	0.29	0.00792	0.032	0.0163	0.0386	0.033	0	0.03	0.191	0.44	0.52	0.44	0.73	0.63	0.53
0.00688	0.00815	0.014	0.00614	0	0.021	0.034	0.014	0.21	0.41	0.23	0.48	0.1	0.41	0.00184	0.0049	0.00522	0.01814	0	0.018	0.072	0.064	0.22	0.4	0.16	0.51	0.13	0.33
0.00539	0.04689	0.05344	0.019	0.057	0.04435	0.16	0.19	1.15	0.69	0.99	0.9	0.45	0.76	0.00739	0.02489	0.02744	0.013	0.053	0.02835	0.07	0.15	0.77	0.5	0.89	0.89	0.38	0.43
0	0.046	0.034	0	0	0	0.13	0.08	0.61	0.27	0.85	0.56	0.44	0.26	0	0.038	0.044	0.033	0	0	0.07	0.05	0.96	0.3	0.45	0.46	0.45	0.33
0.01494		0.08494		0.04994		0.323		0.42		0.63		1.43		0.00294		0.00294		0.01494		0.713		0.33		0.74		0.98
0.006		0		0		0		0		0		0.86		0		0		0		0		0		0		0
0.185		0		0.027		0.22		0.44		0.44		0.04		0.255		0.014		0.031		0.27		0.39		0.44		0.19
0		0		0.004		0.04		0.6		0.58		0.68		0		0		0		0		0.31		0.42		0.44
0.013		0.02294		0.02		0.065		0.95		0.96		0.75		0.033		0.01894		0.036		0.095		0.8		1.03		0.65
0.03187		0.02162		0.017		0.05		0.39		0.47		0.26		0.05587		0.01762		0.077		0.06		0.39		0.45		0.32
Key: I=IFN-γ; 2=IL-2; T=TNF-α
Fig. 3d
CD8+ Polyfunctional T-cell Responses (Ancestral)														CD8+ Polyfunctional T-cell Responses (Omicron)
I+2+T+		I+2+		I+T+		2+T+		I+		2+		T+		I+2+T+		I+2+		I+T+		2+T+		I+		2+		T+
HIV-	PLWH	HIV-	PLWH	HIV-	PLWH	HIV-	PLWH	HIV-	PLWH	HIV-	PLWH	HIV-	PLWH	HIV-	PLWH	HIV-	PLWH	HIV-	PLWH	HIV-	PLWH	HIV-	PLWH	HIV-	PLWH	HIV-	PLWH
0	0.022	0.01638	0.038	0.043	0.054	0	0.145	0.23	0.993	0.28	0.86	0.21	1.17	0	0.00496	0.04038	0.02	0.043	0.04	0.067	0.095	0.28	0.973	0.26	0.58	0.32	1.12
0	0.01697	0.048	0.01659	0.014	0.03115	0.016	0.056	0.12	0.571	0.3	0.413	0.66	0.62	0.012	0	0.049	0.00506	0.014	0.01815	0.056	0.051	0.15	0.541	0.38	0.343	0.32	0.52
0	0.002	0.061	0.02471	0	0	0	0.027	0.99	0.42	0.49	0.34	0	0.46	0	0	0	0.01371	0	0	0	0.02	0.81	0.41	0.57	0.24	0.119	0.32
0	0.00763	0.011	0.01089	0.006	0	0	0	0.37	0.19	0.88	0.518	0.8	0.06	0	0.00458	0.022	0.00305	0	0	0.1	0.06	0.38	0.3	0.73	0.388	0.72	0.3
0.015	0	0.03	0.015	0.018	0	0.031	0.004	0.39	0.19	0.74	0.33	0.23	0.39	0.001	0.001	0.039	0	0.014	0	0.028	0.058	0.52	0.33	0.66	0.29	0.15	0.28
0.02365	0.006	0.01699	0.01591	0.037	0.031	0.053	0.188	0.388	0.53	0.325	0.33	0.45	0.66	0.02165	0.004	0.00699	0.02491	0.008	0.03	0.018	0.098	0.228	0.34	0.215	0.41	0.28	0.58
0	0	0.021	0	0.081	0	0	0.01	0.7	0.19	0.26	0.1	0.15	0.22	0	0	0.081	0.007	0	0.034	0	0	0.64	0.13	0.31	0.1	0.15	0.08
0.0038	0.00113	0	0.00113	0.0072	0.011	0.038	0	0.34	0.34	0.181	0.31	0.3	0.16	0.00751	0	0.027	0	0.0222	0.01	0.113	0.032	0.38	0.26	0.301	0.22	0.32	0
0	0	0.00967	0.00341	0	0.004	0.034	0.03	0.22	0.38	0.13	0.42	0.42	0.63	0	0	0.00867	0.00715	0	0	0	0.15	0.33	0.43	0.23	0.5	0.4	0.62
0	0.00977	0.018	0.07254	0.06354	0.009	0.046	0.048	0.36	0.09	0.27	0.62	0.4	0.5	0	0.01177	0.013	0.03754	0.03554	0.051	0.031	0.056	0.16	0.08	0.3	0.43	0.66	0.47
0.012	0.00598	6e-05	0.018	0	0.024	0.05	0	0.24	0.21	0.23	0.12	0.25	0.16	0	0.012	0	0.003	0.012	0.039	0.084	0	0.25	0.21	0.3	0.24	0.29	0.09
0.00465	0.01158	0.02802	0.007	0.017	0	0.033	0.035	0.49	0.3	1.18	0.53	0.25	0.68	0.00238	0.00231	0.01202	0.016	0.01	0.006	0.077	0.025	0.48	0.26	0.85	0.6	0.5	0.79
0.019	0.00222	0.029	0.003	0	0.012	0.04	0.014	0.44	0.35	0.53	0.21	0.04	0	0.012	3e-05	0.019	0.008	0	0.005	0.03	0	0.47	0.49	0.36	0.45	0.27	0
0.013	0.00177	0.04089	0.05715	0.12	0	0.016	0.023	0.32	0.63	0.61	1.32	1.238	0.39	0.058	0.00199	0.03989	0.04215	0.1	0.002	0.074	0.007	0.32	0.57	0.55	0.88	1.038	0.49
0		0		0		0		0		0		0.25		0		0.004		0		0		0		0		0
0.00811		0.01416		0.014		0.037		0.41		0.73		0.49		0.01611		0.01416		0.02		0.117		0.45		0.55		0.51
0.015		0.019		0.064		0		0.29		0.33		0.24		0.015		0.034		0		0.012		0.23		0.19		0.46
0.09		0.037		0.09		0.069		0.32		0.22		0.13		0.11		0.025		0.19		0.063		0.27		0.18		0.28
0.00081		0.00888		0.027		0.048		0.23		0.13		0.04		0.00893		0.00834		0.092		0.001		0.21		0.1		0.32
Key: I=IFN-γ; 2=IL-2; T=TNF-α
		Fig. 3e
		CD4+ T cells	CD8+ T cells	DP T cells
Combined		0.8563	0.8883	0.3958
HIV-uninfected		0.8842	0.803	0.4634
PLWH		0.8626	0.9253	0.2718

## Sheet: Fig. S2
Fig. S2. T-cell subset proportions and CD4+/CD8+ T-cell ratios.
Fig. S2a
CD4+ T cells						CD8+ T cells
HIV-uninfected		PLWH		Combined		HIV-uninfected		PLWH		Combined
Male (n=10) 61,1	Female (n=11) 64,5	Male (n=7) 50,3	Female (n=10) 29,6	HIV- (n=21) 64,4	PLWH (n=17) 29,9	Male (n=10) 29,4	Female (n=11) 29,0	Male (n=7) 37,8	Female (n=10) 61,7	HIV- (n=21) 29,4	PLWH (n=17) 60,5	Median (%)
67.4	64.5	14.1	27.9	67.4	14.1	29.4	30.8	75.1	67.8	29.4	75.1
68.5	40.7	69.1	54.2	68.5	27.9	27.2	56.5	26.1	43.1	27.2	67.8
44.6	77.1	61.3	29.9	44.6	54.2	47.6	18	33	62.8	47.6	43.1
37.9	70.1	50.3	46.2	64.5	29.9	48.6	26.4	37.8	44.4	30.8	62.8
70.5	65.7	0.1	6.07	37.9	46.2	21.4	29	82.9	89.6	48.6	44.4
57.8	61	28.4	9.59	40.7	6.07	34.7	32.9	64.7	83.8	56.5	89.6
55.7	30	60.2	29.3	77.1	69.1	36.4	53.1	30.7	60.5	18	26.1
64.4	42.9		45.6	70.1	9.59	29.4	48.2		46	26.4	83.8
70.2	77.3		33.4	65.7	29.3	20.7	16.7		60.1	29	60.5
0.63	80.4		9.85	70.5	45.6	18.1	16		75.2	21.4	46
	18.6			57.8	61.3		9.22			34.7	33
				55.7	50.3					36.4	37.8
				61	0.1					32.9	82.9
				30	33.4					53.1	60.1
				64.4	9.85					29.4	75.2
				42.9	28.4					48.2	64.7
				77.3	60.2					16.7	30.7
				80.4						16
				18.6						9.22
				70.2						20.7
				0.63						18.1
Fig. S2b
CD4+CD8+ (DP) T cells
HIV-uninfected		PLWH		Combined
Male (n=10) 0,69	Female (n=11) 0,58	Male (n=7) 0,32	Female (n=10) 0,46	HIV- (n=21) 0,59	PLWH (n=17) 0,37	Median (%)
0.59	0.61	0.18	0.29	0.59	0.18
0.96	0.8	0.32	0.88	0.96	0.29
0.17	0.28	0.37	1.31	0.17	0.88
1.09	0.58	0.37	0.36	0.61	1.31
0.95	0.91	0.02	0.18	1.09	0.36
3.57	0.74	0.071	0.19	0.8	0.18
0.78	0.42	0.48	0.66	0.28	0.32
0.42	0.64		2.4	0.58	0.19
0.46	0.33		0.51	0.91	0.66
0.021	0.52		0.4	0.95	2.4
	0.071			3.57	0.37
				0.78	0.37
				0.74	0.02
				0.42	0.51
				0.42	0.4
				0.64	0.071
				0.33	0.48
				0.52
				0.071
				0.46
				0.021
Fig. S2c
HIV-uninfected		PLWH		Combined
Male (n=10) 1,93	Female (n=11) 2,09	Male (n=7) 1,33	Female (n=10) 0,48	HIV- (n=21) 2,09	PLWH (n=17) 0,48	Median Ratio
2.29	2.09	0.19	0.41	2.29	0.19
2.52	0.72	2.65	1.26	2.52	0.41
0.94	4.28	1.86	0.48	0.94	1.26
0.78	2.66	1.33	1.04	2.09	0.48
3.29	2.27	0	0.07	0.78	1.04
1.67	1.85	0.44	0.11	0.72	0.07
1.53	0.56	1.96	0.48	4.28	2.65
2.19	0.89		0.99	2.66	0.11
3.39	4.63		0.56	2.27	0.48
0.03	5.03		0.13	3.29	0.99
	2.02			1.67	1.86
				1.53	1.33
				1.85	0
				0.56	0.56
				2.19	0.13
				0.89	0.44
				4.63	1.96
				5.03
				2.02
				3.39
				0.03

## Sheet: Fig. S3
Fig. S3. Polyfunctionality of CD4+CD8+ T cells to ancestral SARS-CoV-2 and Omicron variant.
Fig. S3a
CD4+CD8+ (DP) Polyfunctional T-cell Responses (FLS-specific)														CD4+CD8+ (DP) Polyfunctional T-cell Responses (N-specific)
I+2+T+		I+2+		I+T+		2+T+		I+		2+		T+		I+2+T+		I+2+		I+T+		2+T+		I+		2+		T+
HIV-	PLWH	HIV-	PLWH	HIV-	PLWH	HIV-	PLWH	HIV-	PLWH	HIV-	PLWH	HIV-	PLWH	HIV-	PLWH	HIV-	PLWH	HIV-	PLWH	HIV-	PLWH	HIV-	PLWH	HIV-	PLWH	HIV-	PLWH
0	0.7	0	0	0	0	0	0.7	0.098	0.35	0	0.35	0	1.06	0	0.46	0	0	0	0	0.11	0.46	0.15	0.46	0.59	0	1.71	0.46
0.25	0	0	0	1.27	0	0	0	0	0	0.97	0	0.51	1.32	0.36	0	0	0.6	3.94	0	0	0.6	0	0	0.78	0	1.43	0
0	0.16	0	0	0	0.16	1.12	0.055	1.12	0	1.12	0.38	0	0.48	0	0.11	0	0	0	0.22	0	0.22	0	0	0	0.11	0	0.22
0.095	0	0	0	0.54	0.048	0	0.19	0	0.267	0.52	0.557	0.99	0.18	0.47	0.14	0.16	0.207	0.62	0.071	0	0	0.28	0.137	0.22	0.067	0.93	0
0.073	0.22	0.015	0	0	0	0	0.11	0.18	0	0.57	1.76	0.69	0	0.423	0.16	0	0	0	0	0	1.16	0	0	0	0	0.22	0
0.07	0.08	0.063	4.32	0	0	0.25	0	0	0	0.26	0	0.55	0.22	0.45	0.46	0.11	2	0	2	0.23	0	0	0.46	0.22	0	0.66	0.37
0	0	0	0	0	0	1.11	0.11	0	0.32	0	0.01	0	0.35	1.92	0	0	0	0	0	1.92	0	0	0.9	0	0	11	0.87
0	0	0	0	0	0	0.29	0	0.03	0.39	0.48	0	0.22	1.19	0	0	0	0	0.17	0	0.17	0.51	0	1.06	0.17	0.51	0.15	0
0.095	0.16	0	0	0	0	0.24	0.04	0.91	0.19	0.29	0.67	1.8	0.19	0	0.34	0.1	0	0	0	0.7	0	0.7	0.05	0.21	0	0.81	0.39
0	0.309	0	0	0	0.219	0.34	0.1	0	0.18	0.7	0.269	0	0.38	0	0.001	0	0.042	0.27	0.042	0.27	0	0	0.34	0.31	0.209	1.57	0
0	0.07	0	0	0.07	0.11	0.055	0	0.06	0	0.34	0.21	0.61	0.06	0	0	0	0	0	1.3	0.055	0	0.47	0.77	0	0	0	0.24
0.44	0	0	0.16	0	0	0	0	0.05	0	0.11	0	0	0.01	0.1	0.7	0	0	0.2	1.39	0	0	0.41	0	0.52	0	0.07	0
0	0	0.048	0	0	0	0	0	0.39	0	0.01	0	0	0	0	2.22	0.26	1.11	0	3.33	0	0	0.52	0	0	1.11	0	0
0	0.55	0	0	1.14	0	0	0	0.2	0	0	0.33	0	0.96	0	0.21	0	0.21	1.1	0.28	1.1	0.32	0	0	1.1	0	3.3	0
0	0.47	0	0	0	0.64	1.23	1.07	0.11	0	0	2.08	0	0	0	0	0	0	0.82	2.65	0.41	3.08	0	0	0.2	0.16	0.64	5.77
0.44	0	0.037	0	0	0	0	0	0.11	1.01	0.23	0	0.38	0	1.18	0	0	0	0.29	0	0.01	14.91	0.44	0	0	0	0.89	5.56
0	0	0.34	0	0	0	0	0	0.13	0.28	2.41	0.28	0	0	0	0	0	0	0	0	0	0.49	0	0	0	0	0	0
0		0.026		0		0		0		0		0		0.53		0.18		0.51		0		0		0		1.37
0		0.17		0		0.87		0		0		0		0.38		0		0		0		0		0		0.03
Key: I=IFN-γ; 2=IL-2; T=TNF-α
Fig. S3b
CD4+CD8+ (DP) Polyfunctional T-cell Responses (Ancestral)														CD4+CD8+ (DP) Polyfunctional T-cell Responses (Omicron)
I+2+T+		I+2+		I+T+		2+T+		I+		2+		T+		I+2+T+		I+2+		I+T+		2+T+		I+		2+		T+
HIV-	PLWH	HIV-	PLWH	HIV-	PLWH	HIV-	PLWH	HIV-	PLWH	HIV-	PLWH	HIV-	PLWH	HIV-	PLWH	HIV-	PLWH	HIV-	PLWH	HIV-	PLWH	HIV-	PLWH	HIV-	PLWH	HIV-	PLWH
0.4	0	0	0	0.07	0	0.36	0	0.44	1.48	0	0	0.97	0	1.02	0.47	1.05	0.93	0.69	0.41	0.09	0.47	0.6	0.47	0	0	0.14	0.93
0.78	0	0	0	2.34	0	0	0	0	0.33	0.09	0	0.78	0.33	1.32	0	0	0	2.2	0.01	0.43	0.34	0.39	0.01	0.14	0	0	0
0	0	0	0	0	0.11	0	0.34	4.76	0.02	0	0.23	0	0.7	0	0.19	0	0	0	0	0	0.19	12.5	0	0	0.47	0	0.32
0.14	0	0.28	0	0.56	0	0	0	2.29	0.217	0	0.287	0.85	0.05	0.14	0	0	0	0	0	0	0.073	2.54	0	0.16	0	0.7	0
0	0	0	0.51	0	0	0	1.25	0.12	0.24	0	0.47	0	0	0.383	0	0.23	0	0	0	0	0.29	0	0	0.07	0.57	0.28	1.12
0.42	0	0	0	0	2.08	0.43	1.04	0	0	0.31	0.99	0.17	2.54	0.33	2.29	0.22	2.83	0	0.94	0	0	0.54	0.4	0	0.8	0.64	2.14
4	0	0	0	0	0	4	0.3	2	0.3	0	0	0	0.57	0	0	0	0	0	0	0	0.26	0	1.05	0	0	0	1.16
0.17	0	0.17	0	0	0	0	0	0.51	0	0.34	0	0	0.37	0	0	0	0	0	0	0	0	0	1.25	0.34	0	0.16	4.77
0	0	0	0.13	0	0	0	0	0.27	0.79	0.21	0	1	1.19	0.098	0	0	0	0	0	0	0.31	0.64	0.97	0.098	0.31	0.79	1.22
0	0	0	0	0	0	0.76	0	0.13	0.17	0.28	0.139	2.44	0	0.04	0.012	0	0	0	0	0.86	0.04	0	0	0.04	0.079	1.4	0
0.026	0.23	0	0	0	0.46	0	0	0.49	0	0.18	0	0.1	1.97	0	0	0.028	0	0	0.19	0	0	0.47	0	0.16	0	0.2	0.39
0	0	0	0	0.1	0.14	0	0	0.71	0	0	0.09	0	0.73	0.094	0.14	0	0	0	0.7	0.13	0	0.34	0	0.27	0	0	0.25
0	0.23	0	0	0	0.45	0	0	0.77	0	0	0.68	0	0	0	0	0	0	0	0.35	0.22	0	0.44	0	0	0.81	0	0
0.96	0	0	0	1.92	0	0.96	1.15	0	2.94	1.92	0	1.92	8.82	1.14	0	0	0	2.27	0	1.14	1.29	0	1.54	0	0	2.27	0
0		0		0.07		0.04		0.04		0		0.97		0		0		0		0.43		0.21		0		0.52
0		0		0		0		0.25		0.11		0.23		0.12		0		0.21		0.02		0.21		0.19		0.41
0		0		0		0		0.29		0.85		0		0		0.72		0		0.49		0		0		0.16
0.35		0		1.06		0		0.17		0		0		0.99		0		0.6		0		0		0		0
0		0		0.02		1.13		0.38		0.02		0		0.56		0.28		0		0		0.56		0		0
Key: I=IFN-γ; 2=IL-2; T=TNF-α

## Sheet: Fig. S4
Fig. S4. Comparative polyfunctionality of CD4+ and CD8+ T cells in response to ancestral SARS-CoV-2.
	Fig. S4a
	HIV-uninfected		PLWH
	CD4+ T cells	CD8+ T cells	CD4+ T cells	CD8+ T cells
I+, 2+, T+	0.05	0.02	0.06	0.01
I+, 2+	0.02	0.01	0.03	0.01
I+, T+	0.03	0.02	0.03	0.02
2+, T+	0.13	0.07	0.15	0.07
I+	0.52	0.3	0.39	0.36
2+	0.6	0.44	0.55	0.42
T+	0.48	0.34	0.46	0.37
I+/2+/T+	1.73	1.16	1.35	1.1
Key: I=IFN-γ; 2=IL-2; T=TNF-α
	Fig. S4b
	HIV-uninfected		PLWH
	CD4+ T cells	CD8+ T cells	CD4+ T cells	CD8+ T cells
I+, 2+, T+	0.03	0.02	0.05	0.01
I+, 2+	0.03	0.02	0.04	0.02
I+, T+	0.05	0.03	0.04	0.03
2+, T+	0.14	0.05	0.2	0.06
I+	0.61	0.33	0.52	0.35
2+	0.6	0.29	0.62	0.41
T+	0.63	0.36	0.47	0.43
I+/2+/T+	2.11	1.12	1.95	1.19
Key: I=IFN-γ; 2=IL-2; T=TNF-α

## Sheet: Fig. S5
Fig. S5. T-cell activation after stimulation with the full-length spike and nucleocapsid proteins of ancestral SARS-CoV-2.
Fig. S5a
CD4+ T cells				CD8+ T cells				CD4+CD8+ (DP) T cells
HIV-uninfected		PLWH		HIV-uninfected		PLWH		HIV-uninfected		PLWH
Male (n=8) 79,1	Female (n=10) 84,5	Male (n=7) 83,4	Female (n=10) 57,4	Male (n=8) 38,7	Female (n=10) 22,9	Male (n=7) 32,0	Female (n=10) 17,2	Male (n=8) 63,2	Female (n=10) 48,8	Male (n=7) 68,6	Female (n=10) 42,4	Median (%)
67.2	83.4	64.5	73.7	20.7	48	31.1	15.5	70.4	61.5	53.5	58.2
75.6	76.2	88.1	82.8	36.7	18.3	50.8	59.4	55.9	59.1	46.2	16.8
89.3	64.6	84.3	39.4	41.6	20.7	32	9.6	85.3	40.7	75.2	1.82
78.6	42.6	79.5	24.2	20.9	18.3	36.6	13.3	18.6	31.2	49.7	26.5
85.2	77.9	95.8	41	42.3	25	15.6	18.7	76.6	32	93.3	84.8
90.1	89.4	83.4	48.8	66.2	68	10.1	11.7	72.7	55.8	72.4	22.6
79.6	85.7	80.7	73.4	40.7	30.9	68.3	37.8	26.4	40.2	68.6	83.1
49.7	91.2		57.5	21.5	19		15.6	25.2	73.5		21
	85.6		66.5		11.9		29.3		41.7		69.5
	90.9		57.3		65.6		21.2		83.9		77.4
Fig. S5b
CD4+ T cells						CD8+ T cells
HIV-uninfected			PLWH			HIV-uninfected			PLWH
U/S (n=21) 2,81	FLS (n=21) 2,85	N (n=21) 2,86	U/S (n=17) 3,35	FLS (n=17) 4,27	N (n=17) 4,47	U/S (n=21) 15,0	FLS (n=21) 15,5	N (n=21) 15,3	U/S (n=17) 12,9	FLS (n=17) 12,7	N (n=17) 13,2	Median (%)
1.89	1.82	2.01	6.22	6.64	6.67	11.2	10.7	11.1	16.7	16.4	16.5
1.37	1.11	1.16	2.32	2.5	2.23	3.16	3.21	3	12.8	12.7	12.9
1.52	1.49	2.14	3.35	3.31	3.43	3.16	5.23	3.43	12.9	12.7	13.2
1.52	1.31	1.36	12.3	10.8	11.5	14.4	13.7	13.6	24.9	23.6	25.1
1.03	0.93	0.98	2.96	2.71	2.76	1.18	1.26	1.37	7.87	8.11	8.04
2.81	2.67	2.81	12.3	12.5	12.6	16.6	16.5	17.2	6	5.92	5.86
1.4	1.13	1.78	1.65	1.68	1.87	7.28	8.49	8.75	8.37	8.08	8.72
2.91	2.85	2.86	14.4	13.7	14.5	11.4	11.9	11.6	11.1	11	11.9
5.44	5.67	5.65	0.94	0.88	1.1	17.3	17.1	17.3	4.72	5.14	5.56
21.5	17.9	20.9	7.34	7.43	7.52	23.9	22.4	23.4	26.3	29.1	27
4.63	4.5	4.79	0.93	0.85	0.76	17.2	16.8	17.8	5.65	5.15	5.08
8.35	7.9	8.14	4.74	4.27	4.47	18.8	19.9	19.1	13.5	13.1	13.3
7.07	7.25	7.6	2.91	28.6	15.2	23.7	24.7	25.3	17.4	16.9	16.8
5.62	4.73	6	15.9	15.6	15.8	8.32	9.02	9.29	36.1	36.9	37.8
1.83	1.51	2.1	18	16.7	18	4.46	4.02	5.5	37.9	36.2	37.1
7.97	8.14	7.81	1.7	1.48	1.52	43.5	44.3	44.7	16.4	16.6	16.5
1.72	1.64	1.96	3.22	3.71	3.34	21.9	19.8	21.1	6.51	8.12	6.93
3.63	2.99	3.87				15	13.9	15.3
1.64	1.03	1.97				18.6	17.3	18.7
2.72	3.64	3.57				16.7	19.7	20.3
4.19	6.14	5.95				14.7	15.5	14.7
Fig. S5c
CD4+ T cells						CD8+ T cells
HIV-uninfected			PLWH			HIV-uninfected			PLWH
U/S (n=21) 1,47	FLS (n=21) 1,29	N (n=21) 1,50	U/S (n=17) 3,61	FLS (n=17) 3,20	N (n=17) 3,38	U/S (n=21) 7,55	FLS (n=21) 8,24	N (n=21) 7,83	U/S (n=17) 12,2	FLS (n=17) 11,9	N (n=17) 12,0	Median (%)
0.76	0.92	0.97	4.92	5.41	5.24	11.6	13.9	13	36.4	38.5	37.2
1.13	1.06	0.98	1.66	1.32	1.73	6.21	5.62	5.25	21.5	21.6	21.3
1.47	1.37	1.5	1.87	1.81	1.89	1.82	4.71	3.13	11.1	11.9	11.3
0.82	0.8	0.77	13.2	12.8	12.7	8.78	8.36	7.83	20.4	21.1	19.9
0.9	0.88	1.01	1.17	1.03	0.97	1.66	2.33	1.4	4.93	3.9	4.06
2.22	2.3	2.41	17.8	17.9	18.3	5.58	6.24	6.17	31.2	31.7	32.2
1.15	0.77	0.91	1.76	1.77	1.88	7.55	5.78	6.4	12.3	12.9	12
2.04	2.35	2.08	9.72	9.82	9.9	12.2	12.3	12.4	27.6	28.4	27.6
2.65	2.88	3.13	2.23	2.1	2.4	8.04	9.02	9.4	6.83	6.44	7.54
5.33	6.18	5.19	7.18	7.04	6.73	29.9	30.8	30.2	12.2	11.6	12.2
3.75	3.3	3.7	0.89	0.89	0.76	12.9	13.4	12.7	4.48	4.48	4.21
5.71	5.61	5.24	3.61	3.2	3.38	15.9	17.2	15.6	32.2	31.9	32
3.67	4.19	4.19	8.74	21.4	13.6	8.57	9.98	10.2	20.9	17.5	19.4
4.49	2.55	2.34	3.67	3.28	3.49	7.06	8.24	8.24	5.39	5.07	4.71
1.72	1.29	2.06	12.2	11.4	12.4	17.5	15.3	18.1	8.13	9.89	8
14.3	13.6	13.7	1.4	1.23	1.11	12	12.3	11.4	1.08	1.2	0.87
0.81	0.86	0.87	0.038	0.048	0.038	2.69	2.32	2.29	0.28	0.69	0.37
0.26	0.58	0.2				0.33	2.2	0.27
0.063	0.015	0.053				0.26	0.083	0.18
0.086	0.1	0.029				0.081	0.2	0.097
0.015	0.015	0.015				0.21	0.34	0.37
Fig. S5d
CD4+ T cells						CD8+ T cells
HIV-uninfected			PLWH			HIV-uninfected			PLWH
U/S (n=21) 26,7	FLS (n=21) 27,2	N (n=21) 26,8	U/S (n=17) 44,0	FLS (n=17) 38,6	N (n=17) 44,3	U/S (n=21) 12,0	FLS (n=21) 12,2	N (n=21) 12,0	U/S (n=17) 19,8	FLS (n=17) 21,4	N (n=17) 19,9	Median (%)
32.5	32.8	32.2	53.2	53.2	53.1	17.2	19.4	17.1	17.2	16.7	16.3
22.1	22.6	22.8	51.5	50.5	52.3	28.2	32	30.4	18.7	18.5	19.1
10.6	11.5	11.3	36.7	34.4	35.1	5.19	7.84	5.81	33.4	32.1	31.7
26.9	28	26.8	45.6	48.1	47.1	20.6	20.3	18.7	19.8	21.4	19.9
24.2	24.8	24.4	44	44.2	44.3	28.8	30.5	28.8	34.7	37	36.1
39.2	39.4	40.3	32.8	32.7	33.1	21	21.8	22	46.1	46.4	46.3
37.9	38.8	41.9	59.7	60.6	58.8	9.33	8.72	10.6	28.1	28.3	27.1
35.7	36.3	36	37.7	38.6	37	23.3	23.6	23.8	38.1	37.8	36
57.1	57.6	57.1	60.8	60.4	59.5	31.4	34	33	27.8	26.9	26.1
46.7	50.3	48.4	30.2	29.9	29.8	18.2	18.8	18.4	8.35	7.64	8
48.3	47	47.1	76.7	76.6	76.2	30.2	29.7	28.6	27.2	29	27.5
20.7	22.2	19.5	56.1	56.6	57.1	9.73	10.2	8.83	23.8	23.1	24.3
31.3	30.8	30.6	47.6	14.3	60.6	12	12.2	12	18.2	17.1	18.5
25.4	22.4	25.7	5.52	5.25	5.16	11.8	11.8	12	2.81	2.53	2.53
63.2	53.2	61.7	23.2	24.1	22.8	21	17.6	20.2	6.67	7.66	6.56
26.7	27.2	27.6	7.31	6.85	6.93	5.89	5.88	5.99	1.44	1.49	1.32
6.15	5.29	5.39	0.47	0.3	0.85	2.78	2.35	2.23	0.4	0.16	0.49
1.27	6.82	1.14				0.27	4.22	0.37
0.38	0.24	0.11				0.13	0.083	0.18
0.54	0.36	0.33				0.19	0.1	0.16
0.93	0.015	0.6				0.21	0.39	0.71
