# Supplementary material for: T-cell responses to ancestral SARS-CoV-2 and Omicron in unvaccinated hospitalised adults living with and without HIV in South Africa
Source: Research Square preprint supplement (doi:10.21203/rs.3.rs-7588105/v1), 2025-11-26
Supplement: Supplementary file 2 [file 54f1e940c32be0b761a3a48a.docx]

**T-cell responses to ancestral SARS-CoV-2 and Omicron in unvaccinated hospitalised adults living with and without HIV in South Africa**

William C. McMahon1, Gaurav Kwatra1,2,3, Alane Izu1,4, Natali Serafin1, Farzanah Laher1, Sharon Shalekoff5,6, Caroline T. Tiemessen5,6, Shabir A. Madhi1,4,*, Marta C. Nunes1,7,*

# SUPPLEMENTARY INFORMATION

**Supplementary Fig. S1:** Flow cytometry gating strategy and representative

staining profiles.

**Supplementary Fig. S2:**  T-cell subset proportions and CD4+/CD8+ T-cell ratios.

**Supplementary Fig. S3:** Polyfunctionality of CD4+CD8+ T cells to ancestral SARS-

CoV-2 and Omicron variant.

**Supplementary Fig. S4:**  Comparative polyfunctionality of CD4+ and CD8+ T cells in

response to ancestral SARS-CoV-2.

**Supplementary Fig. S5:**  T-cell activation after stimulation with the full-length spike

and nucleocapsid proteins of ancestral SARS-CoV-2.

## Fig. S1

**
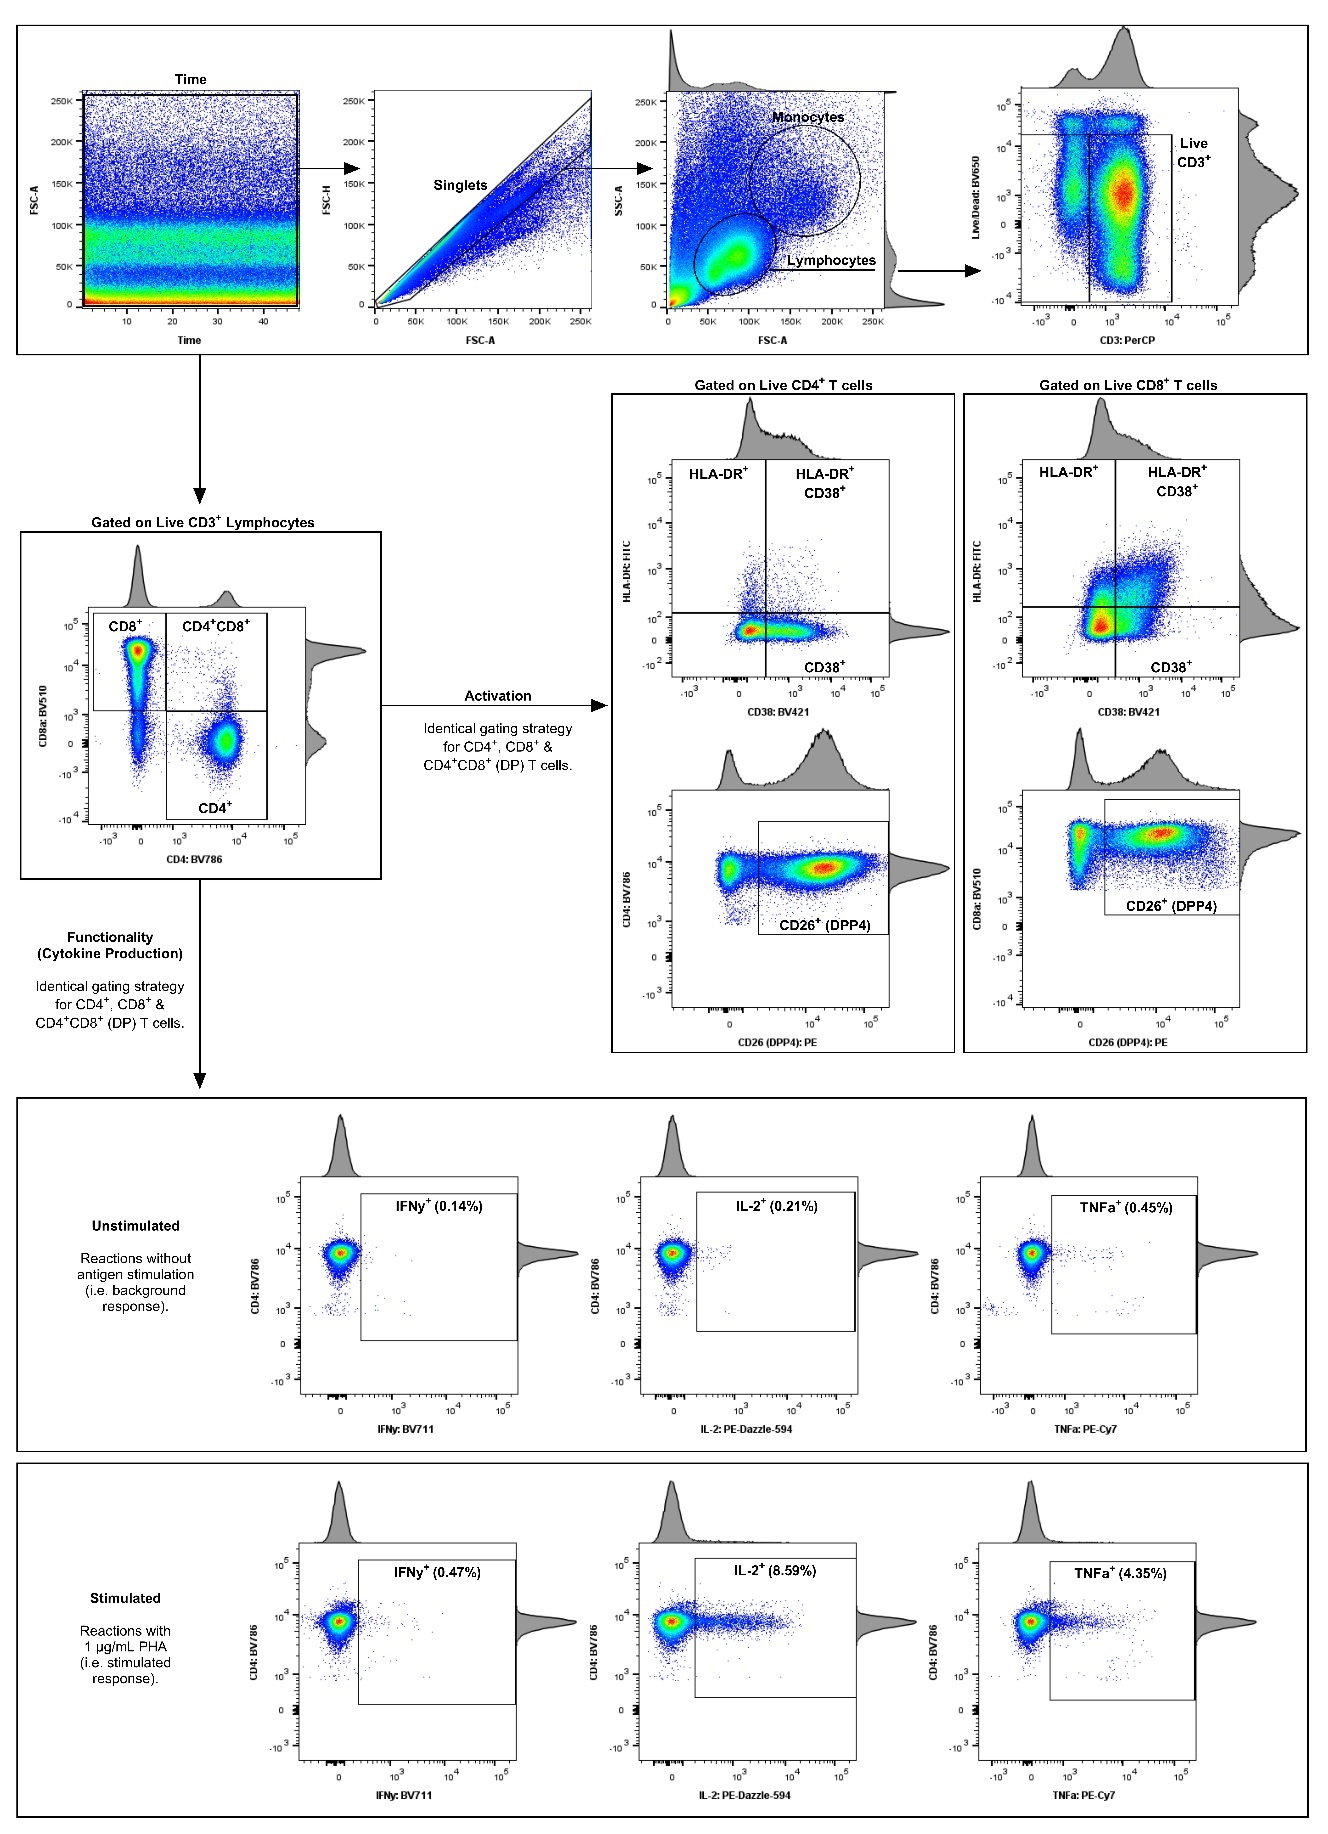
**

**Fig. S1. Flow cytometry gating strategy and representative staining profiles.**

The flow cytometry gating strategy is depicted using pseudocolour plots with accompanying histograms from a COVID-19-vaccinated donor (the plate control). **(a)** A time gate was applied to include only data acquired at a consistent flow rate. Doublets were excluded by gating on FSC-A vs. FSC-H, followed by the selection of lymphocytes based on FSC-A and SSC-A properties. Live CD3+ lymphocytes were selected as the final gating population to ensure the acquisition of approximately 100,000 events (cells) for each reaction. **(b)** CD4+, CD8+, and CD4+CD8+ (double positive, DP) T cells were individually gated and analysed for activation and functional responses. **(c)** T-cell activation was characterised by the extracellular expression of CD26 (DPP4), CD38, and HLA-DR. **(d)** Functional responses were assessed by the intracellular expression of IFN-γ, IL-2, and TNF-α. T-cell responses for an unstimulated control and a PHA-stimulated control are shown, with response frequencies indicated in each plot.

##
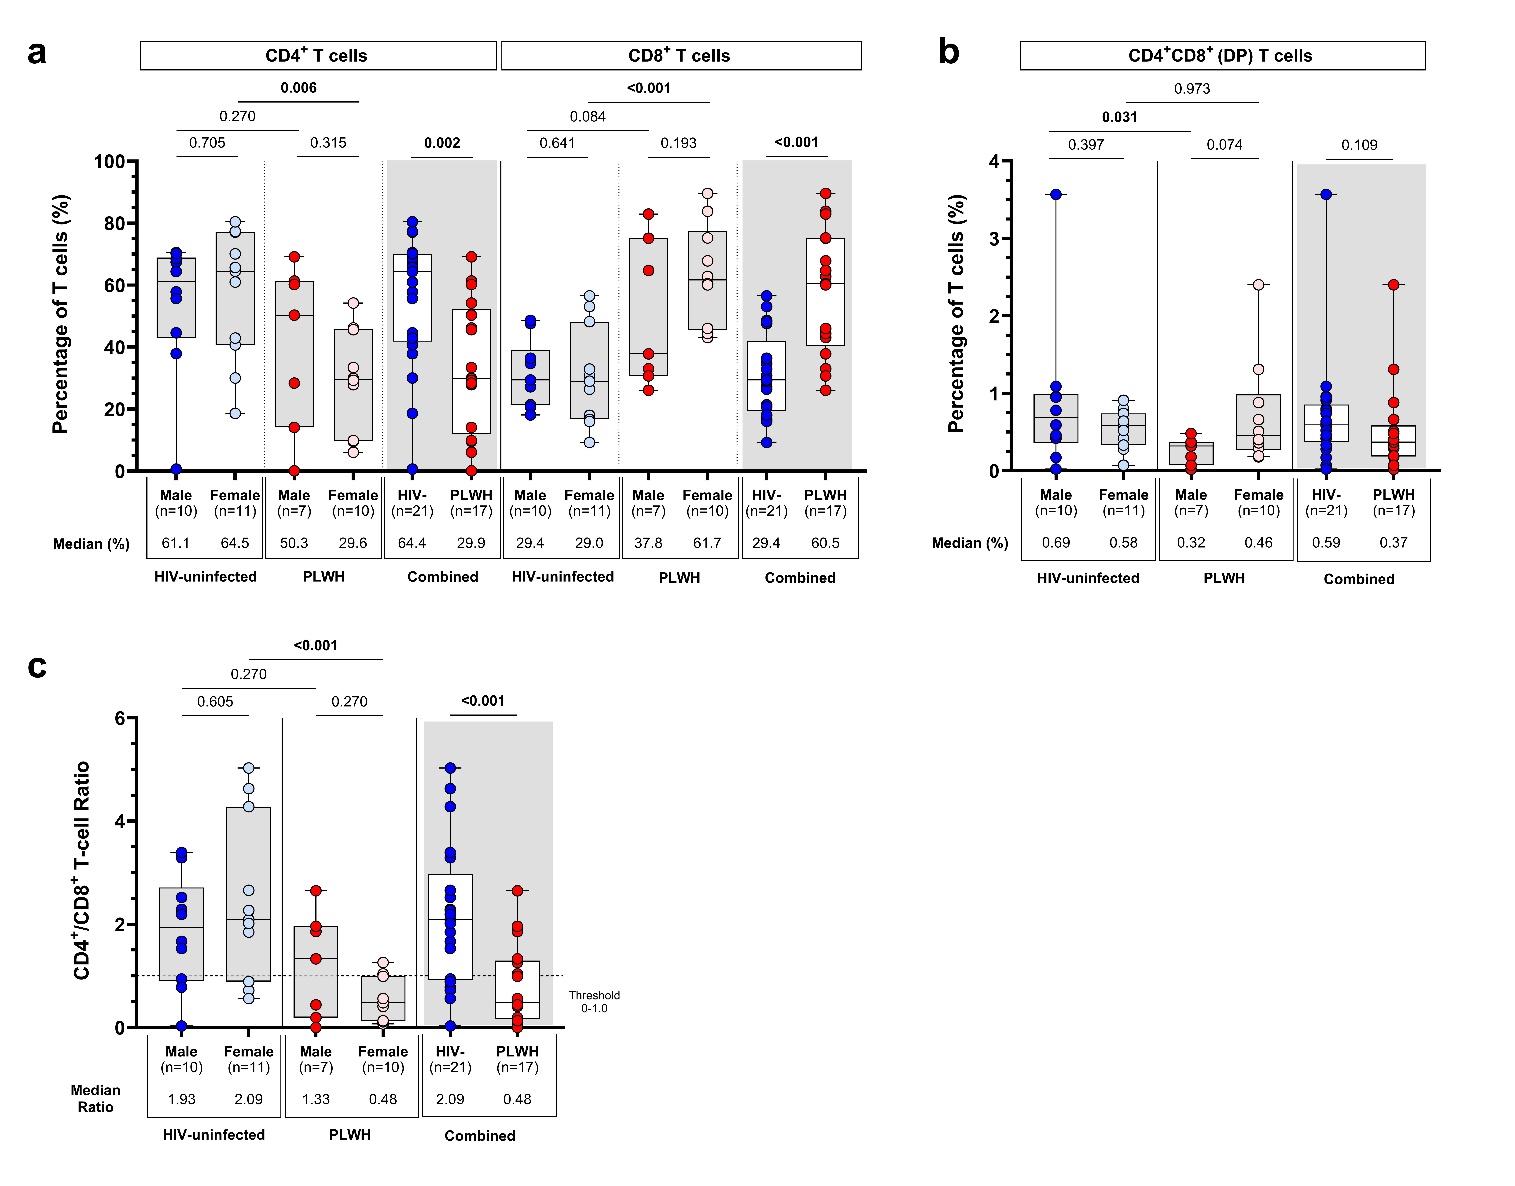
Fig. S2

**Fig. S2.** **T-cell subset proportions and CD4+/CD8+ T-cell ratios.**

**(a, b)** Proportion of live CD3+ T-lymphocytes expressing CD4 and CD8 among participants living with (n=17) and without HIV (n=21), with additional stratification by biological sex (male and female). **(c)** CD4+/CD8+ T-cell ratios. Each participant is represented by an individual point, with median proportions displayed below each axis. Box-and-whisker plots show medians (horizontal black lines), interquartile ranges (boxes), and minimum/maximum values (whiskers). Statistical comparisons between unpaired groups (HIV-uninfected vs. PLWH; male vs. female) were performed using the Mann–Whitney *U*-test. Denotations: Combined: participants living with and without HIV; PLWH: participants living with HIV.

## Fig. S3


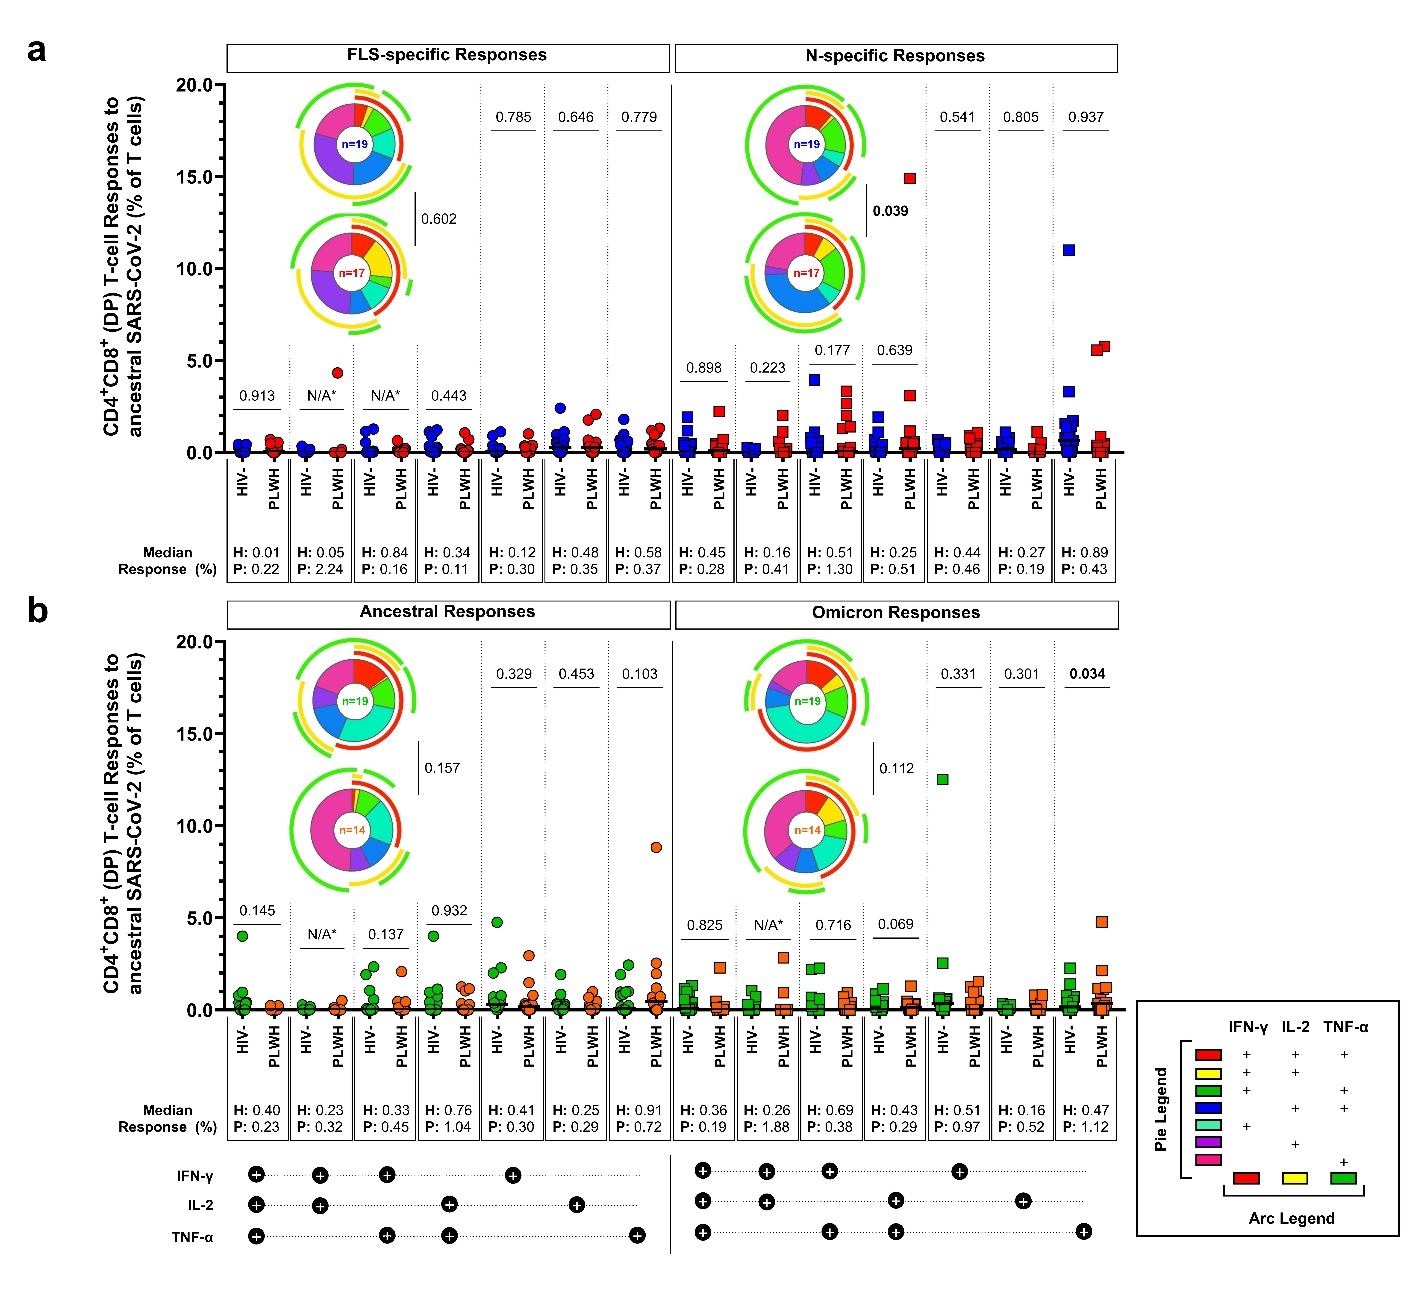


**Fig. S3.** **Polyfunctionality of CD4+CD8+ T cells to ancestral SARS-CoV-2 and Omicron variant.**

Polyfunctionality profiles of CD4+CD8+ (double positive, DP) T cells in response to **(a)** full-length spike (FLS) and nucleocapsid (N) proteins of ancestral SARS-CoV-2, as well as **(b)** partial ancestral SARS-CoV-2 and Omicron (BA.4/BA.5) spike proteins. Each participant is represented by an individual point, with median responses displayed below each axis. Polyfunctional response patterns are colour-coded and summarised in pie charts with overarching legend denoting cytokine production. Adjusted multivariate log-linear regression was used for unpaired comparisons between HIV-uninfected participants and PLWH. Differences in overall polyfunctional T-cell response profiles were assessed using a permutation test (10,000 iterations). Denotations: HIV-: HIV-uninfected participants; N/A*: not applicable – *P*-values could not be determined due to only two participants having polyfunctional response values >0.00%; PLWH: participants living with HIV.

## Fig. S4


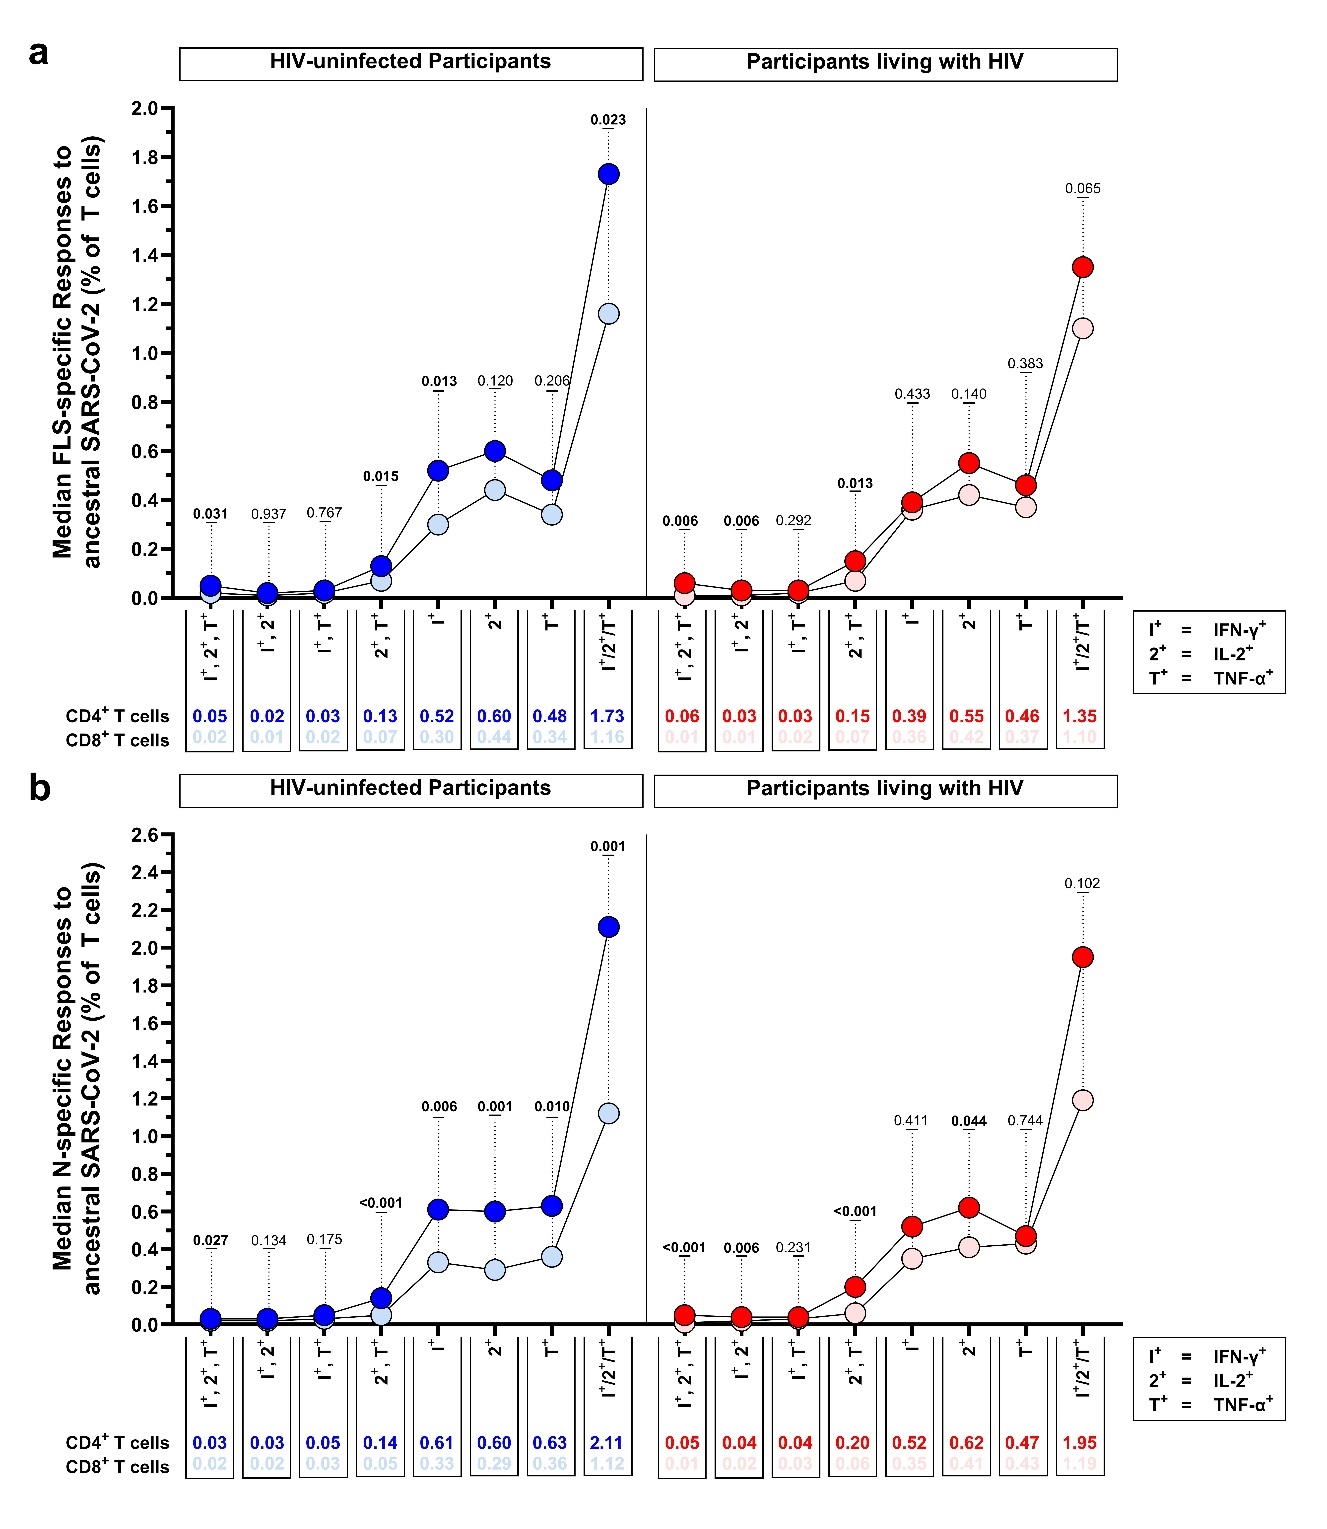
**Fig. S4.** **Comparative polyfunctionality of CD4+ and CD8+ T cells in response to ancestral SARS-CoV-2.**

**(a, b)** Direct median comparisons of CD4+ and CD8+ T-cell polyfunctionality in response to the full-length spike (FLS) and nucleocapsid (N) proteins of ancestral SARS-CoV-2, stratified by HIV status. Each data point represents the median T-cell response (displayed below the axis) of positive responders for each cytokine combination. The Wilcoxon signed-rank test was used for paired comparisons (CD4+ vs. CD8+). Significant *P*-values are indicated in bold. Denotations: FLS: full-length spike glycoprotein; IFN-γ: interferon gamma; IL-2: interleukin 2; N: nucleocapsid protein; PLWH: participants living with HIV; TNF-α: tumor necrosis factor alpha.

##
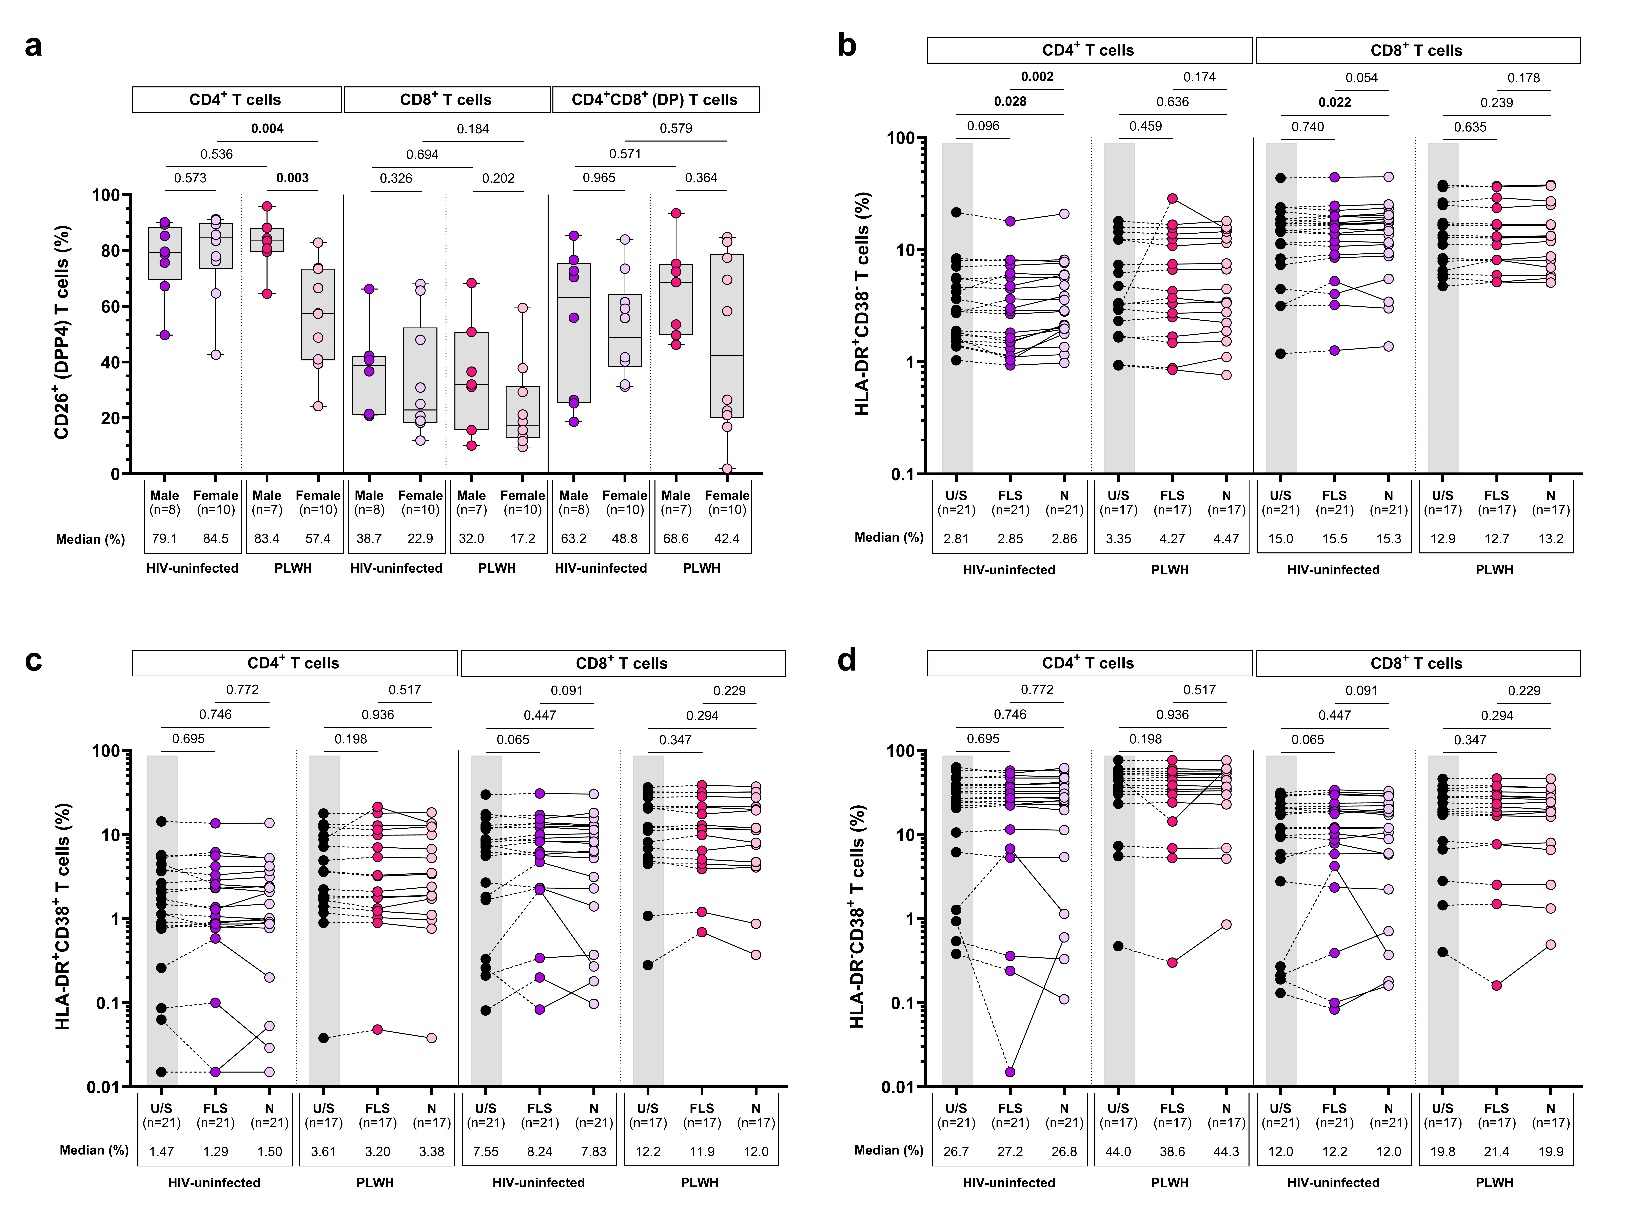
Fig. S5

**Fig. S5.** **T-cell activation after stimulation with the full-length spike and nucleocapsid proteins of ancestral SARS-CoV-2.**

**(a)** Proportion of CD4+, CD8+, and CD4+CD8+ (double positive, DP) T cells expressing CD26 (DPP4) among participants living with (n=17) and without HIV (n=18), further stratified by biological sex (male vs. female). Box-and-whisker plots show medians (horizontal black lines), interquartile ranges (boxes), and minimum/maximum values (whiskers). CD4+ and CD8+ T-cell activation following stimulation with the full-length spike (FLS) and nucleocapsid (N) proteins of ancestral SARS-CoV-2, as measured by the proportion of cells expressing **(b)** HLA-DR+CD38-, **(c)** HLA-DR+CD38+, or **(d)** HLA-DR-CD38+. Each participant is represented by an individual point, with median proportions displayed below each axis. Statistical comparisons between unpaired (HIV-uninfected vs. PLWH; male vs. female) and paired (U/S vs. FLS; U/S vs. N; FLS vs. N) groups were performed using adjusted multivariate log-linear regression and the Wilcoxon signed-rank test, respectively. Denotations: FLS: full-length spike glycoprotein; N: nucleocapsid protein; PLWH: participants living with HIV; U/S: unstimulated.
